# Supplementary material
Source: PubMed Central journal article supplement (PMC4497929)
Supplement: NIHMS698498-supplement-01.pdf [file NIHMS698498-supplement-01.pdf]

*Supplemental Digital Content*

**Figure 1. Kaplan Meier curves for onset of attention deficit/hyperactivity disorder (ADHD), behavior problems, and depressed mood for oldest affected male sample (N=765).**

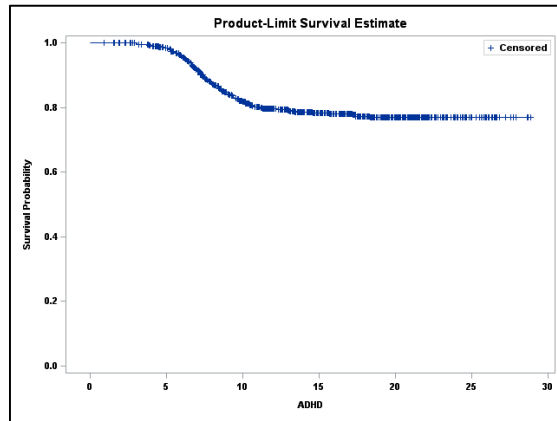

**ADHD**

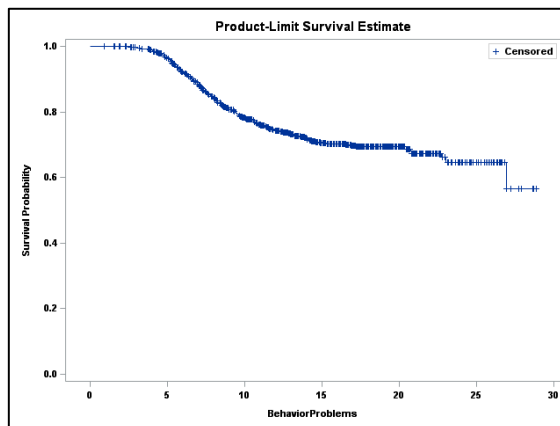

**Behavior problems**

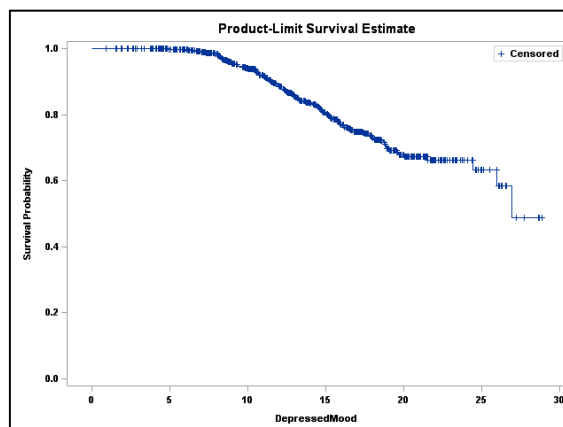

**Depressed mood**

**Table 1. Kaplan-Meier results for onset of neurobehavioral concerns using oldest affected male sample and age recoded samples from the Muscular Dystrophy Surveillance, Tracking and Research Network (MD STARnet), 1982-2011 (n=765)**

| <i>Models</i>                                        | <i>Count concerns</i> | <i>Censored n (%)<sup>1</sup></i> | <i>% without concern</i> | <i>% with concern</i> |
|------------------------------------------------------|-----------------------|-----------------------------------|--------------------------|-----------------------|
| <b>Oldest Affected Male Sample</b>                   |                       |                                   |                          |                       |
| ADHD                                                 | 146                   | 619 (81)                          | 77                       | 23                    |
| Behavior problems                                    | 202                   | 563 (74)                          | 57                       | 43                    |
| Depressed mood                                       | 143                   | 622 (81)                          | 49                       | 51                    |
| <b>Age of Risk Recoded Sample<sup>2</sup></b>        |                       |                                   |                          |                       |
| ADHD                                                 | 141                   | 624 (82)                          | 78                       | 22                    |
| Behavior problems                                    | 185                   | 580 (76)                          | 72                       | 28                    |
| Depressed mood                                       | 135                   | 630 (82%)                         | 70                       | 30                    |
| <b>General Population Recoded Sample<sup>3</sup></b> |                       |                                   |                          |                       |
| ADHD                                                 | 146                   | 619 (81)                          | 77                       | 23                    |
| Behavior problems                                    | 195                   | 570 (75)                          | 70                       | 30                    |
| Depressed mood                                       | 123                   | 642 (84)                          | 75                       | 25                    |

ADHD=attention deficit/hyperactivity disorder.

<sup>1</sup> Censored may be due to no documentation of neurobehavioral concern at last health encounter, no clinical follow-up in that year, or case deceased.

<sup>2</sup> Recoded ages determined from maximum age of risk for onset of neurobehavioral concerns. Age at onset of neurobehavioral concern was used for those with documented concerns, and age at last visit was used for those without documented neurobehavioral concerns (i.e., ages on or after the 14<sup>th</sup> birthday were coded as 14 for ADHD and behavior problems; ages on or after the 19<sup>th</sup> birthday were coded as 19 for depressed mood).

<sup>3</sup> Recoded age determined from general population sample ages. Age at onset of neurobehavioral concern was used for those with documented neurobehavioral concerns, and age at last visit was used for those without neurobehavioral concerns (i.e., ages on or after the 17<sup>th</sup> birthday were coded as 17 for all neurobehavioral concerns).

Figure 2. Kaplan Meier curves for onset of attention deficit/hyperactivity disorder (ADHD), behavior problems, and depressed mood using age-recoded samples.

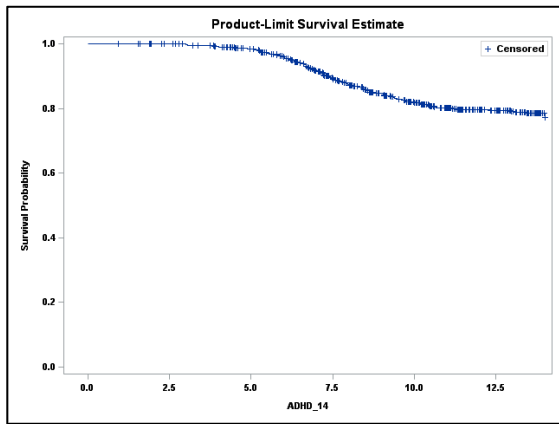

ADHD-‘Age at risk’ recoded sample

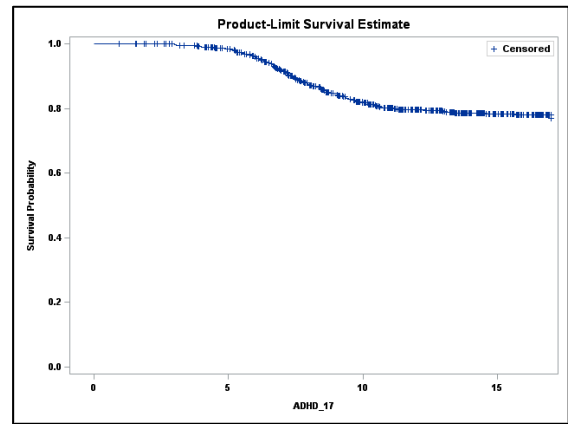

ADHD-‘General population’ recoded sample

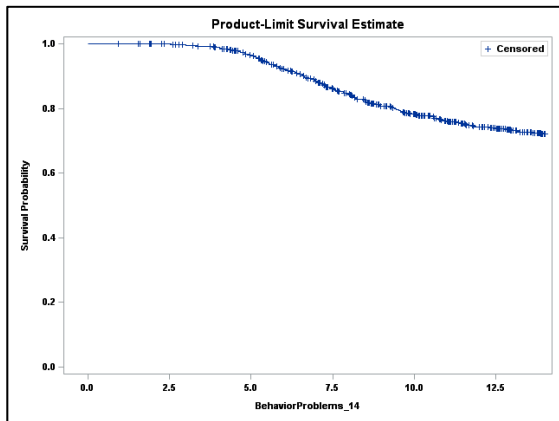

Behavior problems-‘Age at risk’ recoded sample

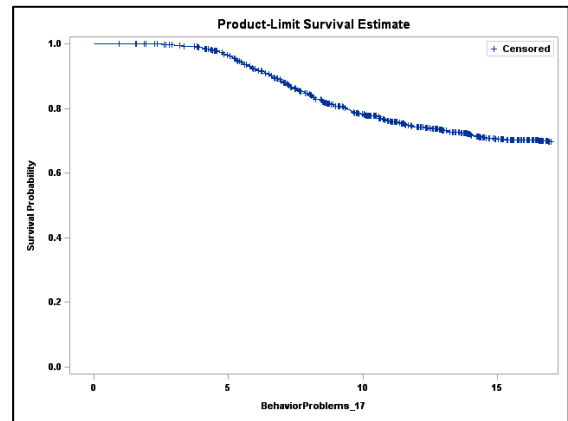

Behavior problems-‘General population’ recoded sample

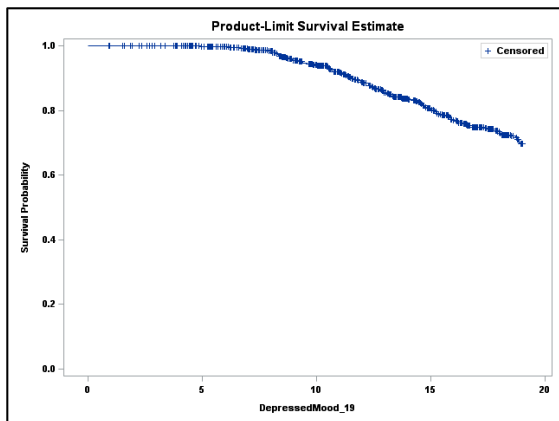

Depressed mood-‘Age at risk’ recoded sample

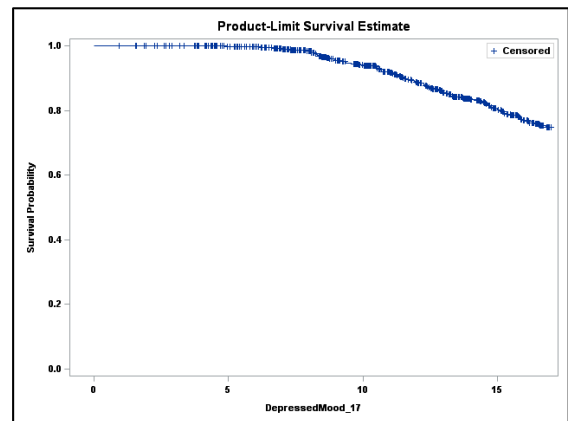

Depressed mood-‘General population’ recoded sample

**Figure 3. Comparison of crude hazard ratios (HR)s and 95% confidence limits (CL) for associations between corticosteroids<sup>1</sup> and neurobehavioral outcomes, estimated from the oldest affected male sample and age of risk<sup>2</sup> and general population<sup>3</sup> recoded samples from the Muscular Dystrophy Surveillance, Tracking and Research Network (MD STARnet), 1982-2011 (n=765)**

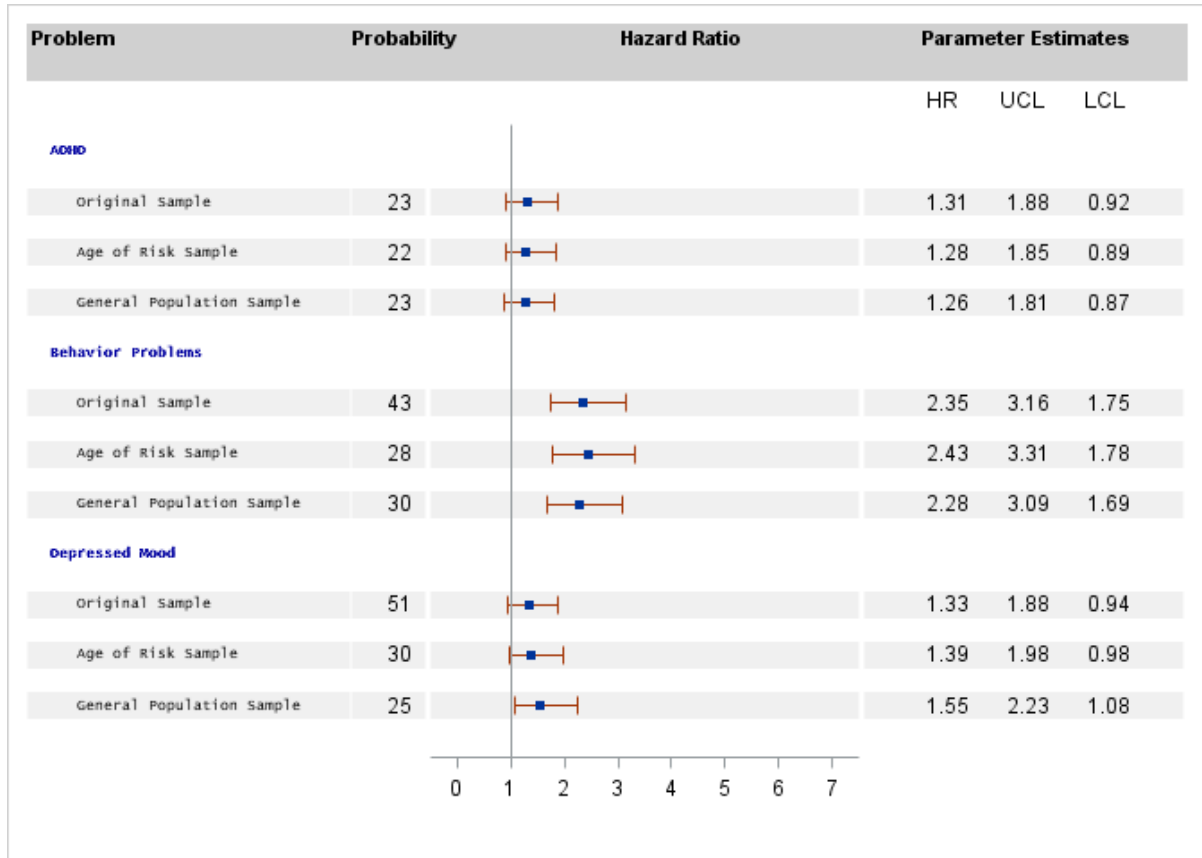

ADHD=attention deficit/hyperactivity disorder. UCL=upper confidence limit. LCL=lower confidence limit.

<sup>1</sup>Corticosteroid use defined as at least one day of use within a year.

<sup>2</sup>Recoded ages determined from maximum age of risk for onset of neurobehavioral concerns. Age at onset of neurobehavioral concern was used for those with documented concerns, and age at last visit was used for those without documented neurobehavioral concerns (i.e., ages on or after the 14<sup>th</sup> birthday were coded as 14 for ADHD and behavior problems; ages on or after the 19<sup>th</sup> birthday were coded as 19 for depressed mood).

<sup>3</sup>Recoded age determined from general population sample ages. Age at onset of neurobehavioral concern was used for those with documented neurobehavioral concerns, and age at last visit was used

for those without neurobehavioral concerns (i.e., ages on or after the 17<sup>th</sup> birthday were coded as 17 for all neurobehavioral concerns).

**Figure 4. Comparison of crude hazard ratios (HR)s and 95% confidence limits (CL) for associations between mobility assistive device use and neurobehavioral concerns, estimated from the oldest affected male sample and age of risk<sup>1</sup> and general population<sup>2</sup> recoded samples from the Muscular Dystrophy Surveillance, Tracking and Research Network (MD STARnet) , 1982-2011 (n=765)**

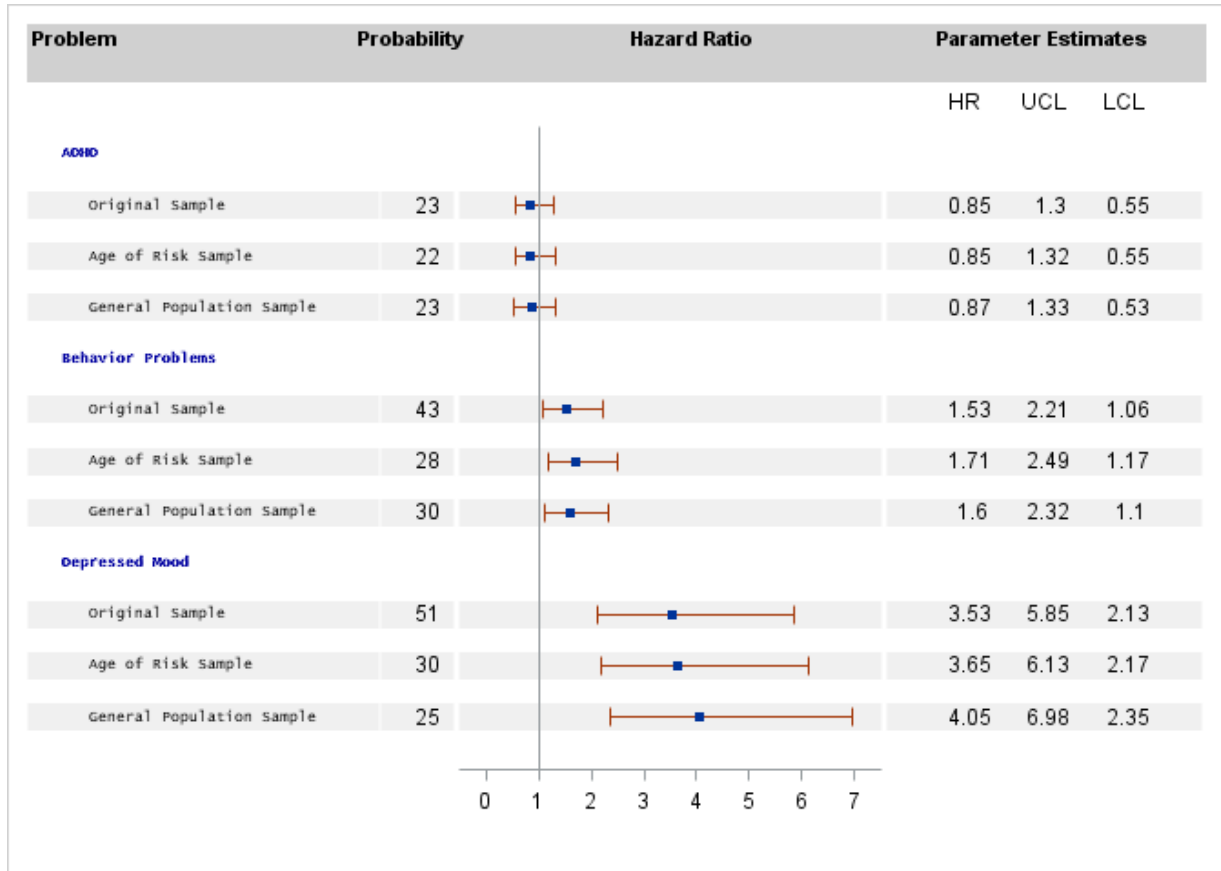

ADHD=attention deficit/hyperactivity disorder. UCL=upper confidence limit. LCL=lower confidence limit.

<sup>1</sup> Recoded ages determined from maximum age of risk for onset of neurobehavioral concerns. Age at onset of neurobehavioral concern was used for those with documented concerns, and age at last visit was used for those without documented neurobehavioral concerns (i.e., ages on or after the 14<sup>th</sup> birthday were coded as 14 for ADHD and behavior concerns; ages on or after the 19<sup>th</sup> birthday were coded as 19 for depressed mood).

<sup>2</sup> Recoded age determined from general population sample ages. Age at onset of neurobehavioral problem was used for those with documented neurobehavioral concerns, and age at last visit was used for those without neurobehavioral concerns (i.e., ages on or after the 17<sup>th</sup> birthday were coded as 17 for all neurobehavioral concerns).
